# Supplementary material for: Covalent attachment of a fluorescent ‘Pourbaix sensor’ onto a polymer bead for sensing in water
Source: Royal Society of Chemistry journal article supplement (doi:10.1039/c8nj03224f), 2018-01-01
Supplement: c8nj03224f1.pdf [file c8nj03224f1.pdf]

# Supporting Information

## New Journal of Chemistry

### **Covalent Attachment of a Fluorescent ‘Pourbaix Sensor’ onto a Polymer Bead for Sensing in Water**

Matthew Vella Refalo, Jake C. Spiteri and David C. Magri\*

Department of Chemistry,  
Faculty of Science, University of Malta, Msida, MSD 2080, Malta

Corresponding author: Prof. Dr David C. Magri

phone: (356) 2340 2276

email: david.magri@um.edu.mt

## Table of Contents

|                                                                                                                                                                                                                                                                                                                                                                                            |   |
|--------------------------------------------------------------------------------------------------------------------------------------------------------------------------------------------------------------------------------------------------------------------------------------------------------------------------------------------------------------------------------------------|---|
| <b>Experimental</b> .....                                                                                                                                                                                                                                                                                                                                                                  | 2 |
| <b>Synthesis</b> .....                                                                                                                                                                                                                                                                                                                                                                     | 3 |
| <b>Figure S1.</b> Reaction scheme for the synthesis of <b>3</b> and covalent attachment on the polymer bead to yield <b>4</b> .....                                                                                                                                                                                                                                                        | 3 |
| <b>Figure S2.</b> UV-visible absorption spectra of 10 $\mu\text{M}$ <b>3</b> in 1:1 (v/v) methanol/water at pH 3.0, 7.0 and 10.5.....                                                                                                                                                                                                                                                      | 4 |
| <b>Figure S3.</b> Fluorescent spectra of 10 $\mu\text{M}$ <b>3</b> in 1:1 (v/v) methanol/water excited at 385 nm. The input conditions are: (a) high $\text{H}^+$ and high $\text{Fe}^{3+}$ , (b) high $\text{H}^+$ , (c) high $\text{Fe}^{3+}$ , and (d) neat sensor. The $\text{H}^+$ and $\text{Fe}^{3+}$ concentrations are 200 $\mu\text{M}$ and 20 $\mu\text{M}$ , respectively..... | 4 |
| <b>Figure S4.</b> $^1\text{H}$ NMR spectrum of <b>3</b> in $\text{CDCl}_3$ .....                                                                                                                                                                                                                                                                                                           | 5 |
| <b>Figure S5.</b> FTIR spectrum of <b>3</b> .....                                                                                                                                                                                                                                                                                                                                          | 6 |
| <b>Figure S6.</b> HRMS of compound <b>3</b> .....                                                                                                                                                                                                                                                                                                                                          | 7 |

# 1 Experimental

## 1.1 Instrumentation

Syntheses were performed with an IKA C-MAG HS 7 hot plate assisted by an IKA ETS-D5 temperature probe to help maintain a constant temperature during reflux. Thin-layer chromatography (TLC) was performed on pre-coated silica plates (Sigma-Aldrich) using glass capillary tubes. The spots were observed under long wavelength (365 nm) and short wavelength (254 nm) UV light from a UVGL-58 handheld lamp. Melting points were measured with a Stuart SMP11 melting point apparatus.

NMR spectra were acquired with a Bruker Avance III HD NMR spectrometer fitted with an Ascend 500 11.75 Tesla superconducting magnet and a multinuclear 5mm PABBO probe. The frequency is 500.13 MHz for  $^1\text{H}$  NMR and 125.76 MHz for  $^{13}\text{C}$  NMR. Data was analysed and processed by means of the software Topspin ver.3.2. Chemical shifts were reported in ppm downfield with respect to TMS at 0.00 ppm at 298 K. Infra-red spectra were recorded using a Shimadzu IR-Affinity-1 spectrophotometer between 4000-400  $\text{cm}^{-1}$ . The instrument was calibrated against 1601  $\text{cm}^{-1}$  polystyrene absorption peak. IR analyses were performed as KBr disks or as a thin film between NaCl plates. The high resolution mass spectrometry (HRMS) was performed by ESI-ToF outsourced to Medac Ltd (UK). <http://medacltd.com/>

UV-visible absorption spectra were acquired on a Jasco V-650 spectrophotometer. Quartz cells with a pathlength of 1.0 cm were used for the measurements. Parameters of the instrument were set at 0.5 nm bandwidth and 400 nm/min scan speed. Blank spectrum was performed on the neat solvent as a reference prior the measurements of the spectra. Fluorescent measurements were acquired with a Jasco FP-8300 spectrophotometer. Quartz cells with a pathlength of 1.0 cm were used for the measurements. The parameters were excitation and emission bandwidths of 2.5 nm, 50 msec response time, and a scanning speed of 200  $\text{nm min}^{-1}$ . The absorbance of the solutions for fluorescence was set to less than 0.1 to prevent quenching of the emission.

Photos of beads were taken with a fluorescent microscope Axiovert 40 CLF, manufactured by Carl Zeiss MicroImaging. The microscope had an ocular magnification of  $\times 10$ , and the magnification that was used was  $\times 40$ . As a source UV light, a low pressure mercury lamp was used. A UV filter with an excitation band between 450-490 nm was used. The emission of light started from 515 nm and the beam splitter was adjusted to 510 nm.

## Synthesis

### Synthesis of *N*-Ferrocenyl-4-((4-(2-methyl-1,3-dioxo-2,3-dihydro-1H-benzo[de]isoquinolin-6-yl)piperazin-1-yl)methyl)benzoic acid **3**

*N*-Ferrocenylmethyl-4-piperazine-1,8-naphthalimide **2** (76 mg, 0.16 mmol), 4-(bromomethyl)benzoic acid (114 mg, 0.53 mmol) and triethylamine (88  $\mu$ L, 0.63 mmol) were dissolved in 4 mL of 1,2-dichloroethane and refluxed at 90  $^{\circ}$ C for 3 hours. The solution was extracted with 1,2-dichloromethane and washed with 10% aqueous NaOH. The product was recrystallised from acetone to give an orange powder in 19% yield (22 mg). m.p. > 250  $^{\circ}$ C;  $R_f$  = 0.44 (9:1 (v/v)  $\text{CH}_2\text{Cl}_2$ /methanol); FTIR (KBr, salt,  $\text{cm}^{-1}$ ): 3051, 2950, 2850, 1695 (C=O), 1653, 1585, 1382, 1183, 1110; MS (ES-TOF, 1.56 mV)  $m/z$  (%): 177 (59), 178 (10), 410 (100), 411 (28), 412 (5); HRMS for  $\text{C}_{32}\text{H}_{43}\text{N}_4\text{O}_5\text{FeNa}$  [M+Na] calculated 642.2481, found 642.2484.

### Attachment of **3** onto Tentagel

To a 50 mL round-bottom flask, 16 mg (0.025 mmol) of **3**, 26 mg (0.13 mol) of DCC and 100  $\mu$ L of HOBT were dissolved in 1 mL of DMF. The reaction was stirred at 40  $^{\circ}$ C for 4 hours. The beads were washed sequentially with 10 mL of DMF, 1:1 (v/v) DMF/MeOH and MeOH.

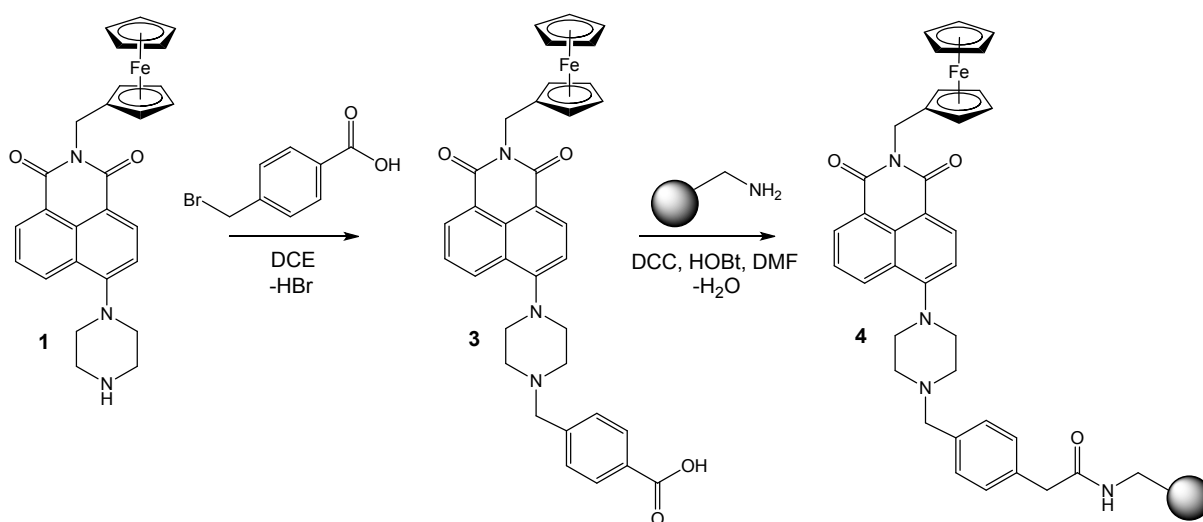

**Figure S1.** Reaction scheme for the synthesis of **3** and covalent attachment on the polymer bead to yield **4**.

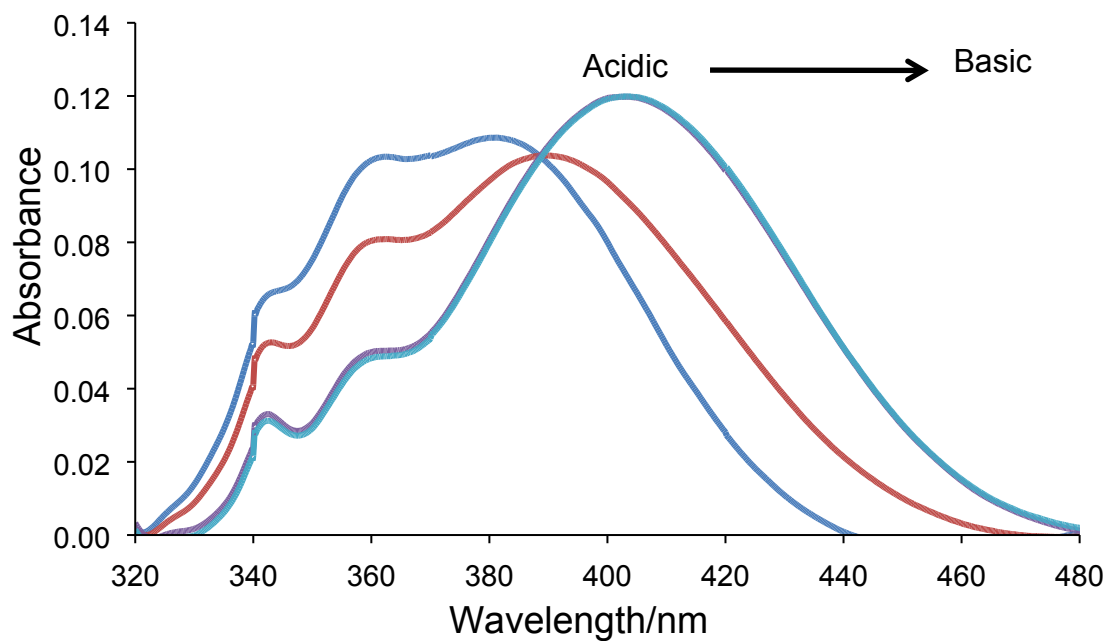

**Figure S2.** UV-visible absorption spectra of 10  $\mu\text{M}$  **3** in 1:1 (v/v) methanol/water at pH 3.0, 7.0 and 10.5.

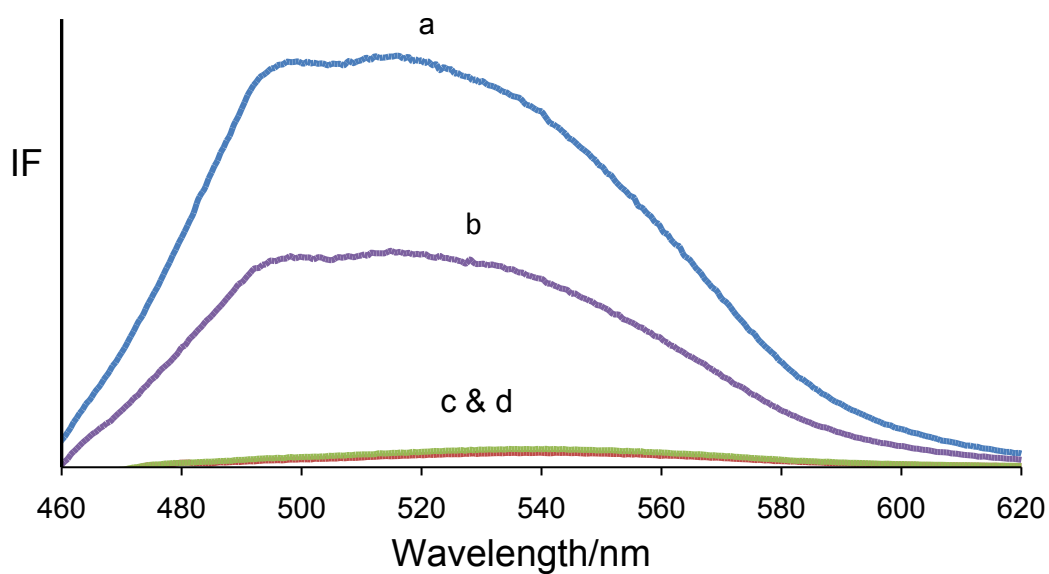

**Figure S3.** Fluorescent spectra of 10  $\mu\text{M}$  **3** in 1:1 (v/v) methanol/water excited at 385 nm. The input conditions are: (a) high  $\text{H}^+$  and high  $\text{Fe}^{3+}$ , (b) high  $\text{H}^+$ , (c) high  $\text{Fe}^{3+}$ , and (d) neat sensor. The  $\text{H}^+$  and  $\text{Fe}^{3+}$  concentrations are 200  $\mu\text{M}$  and 20  $\mu\text{M}$ , respectively.

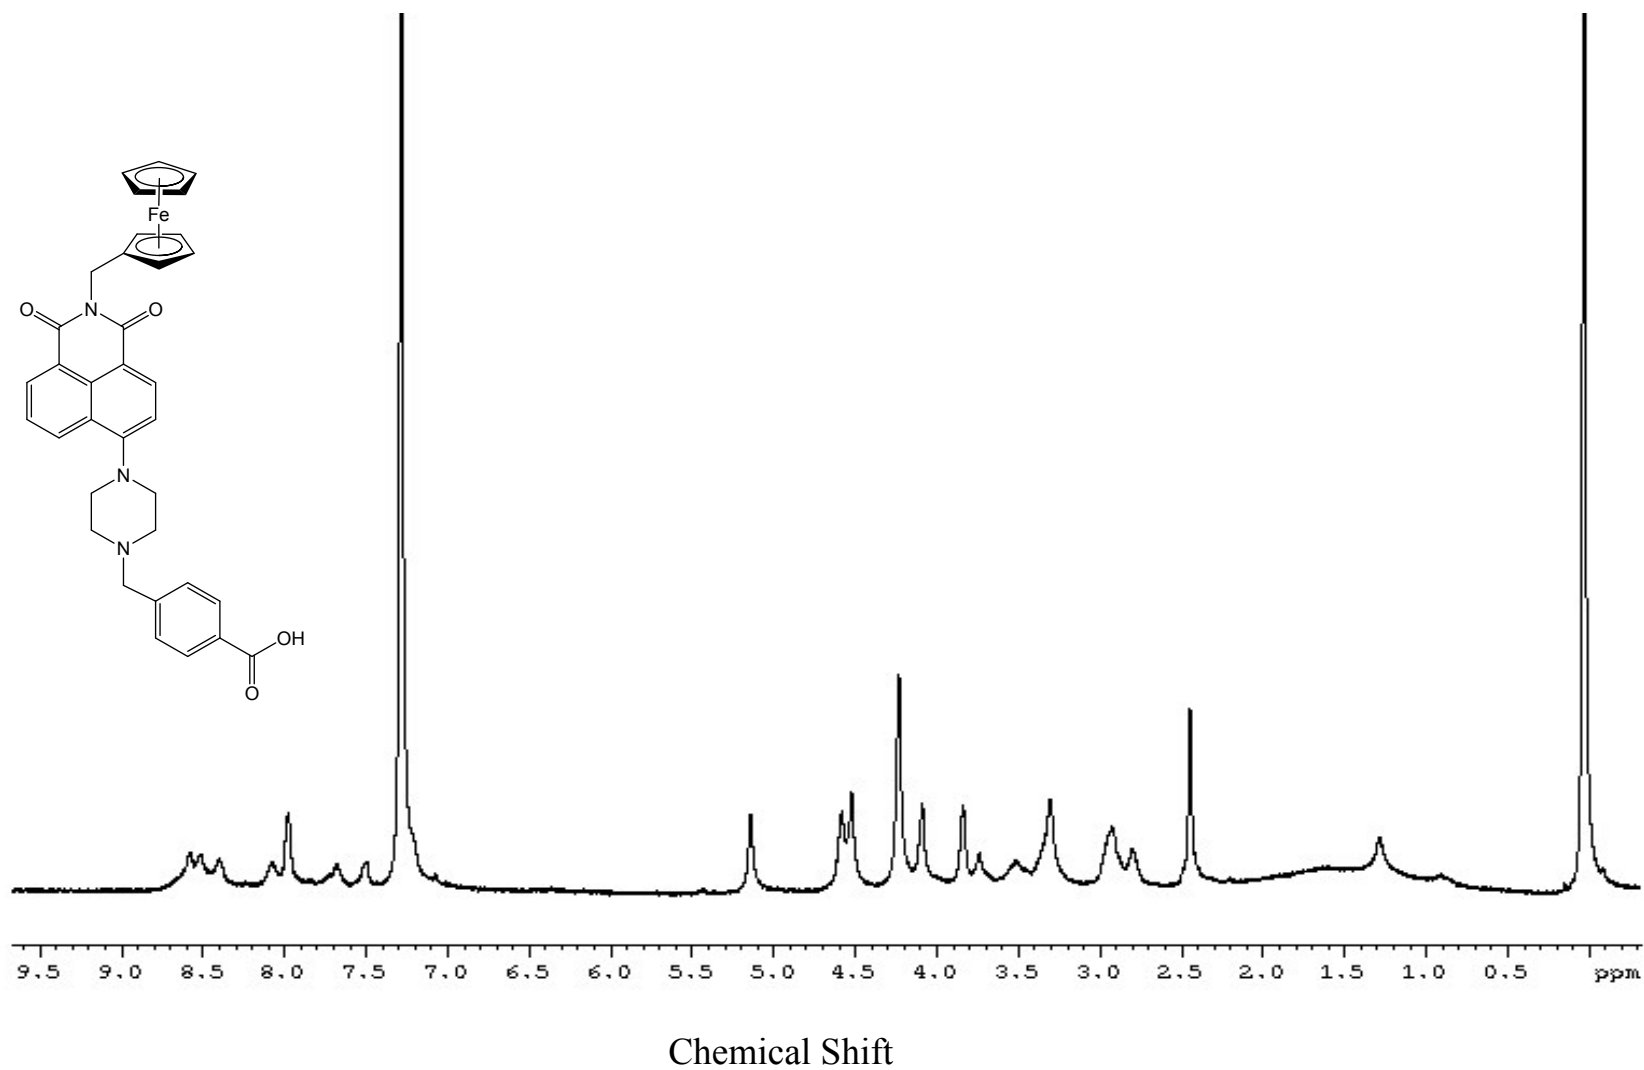

**Figure S4.**  $^1\text{H}$  NMR spectrum of **3** in  $\text{CDCl}_3$ .

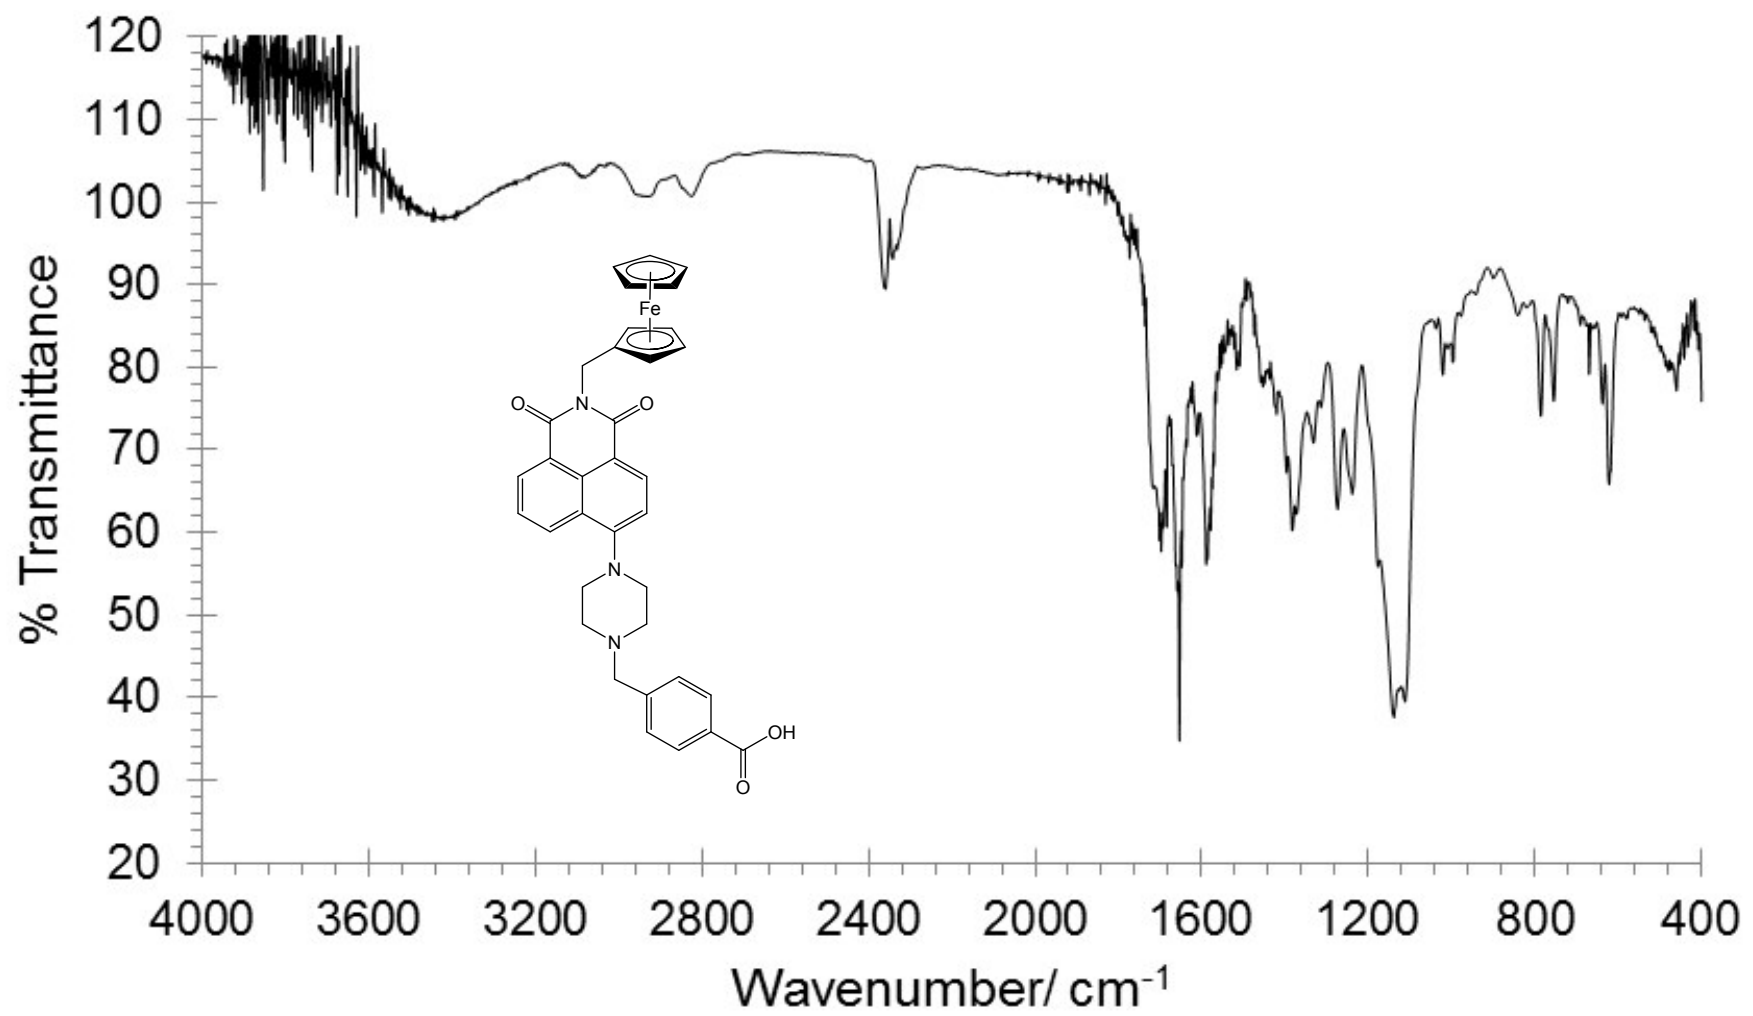

Figure S5. FTIR spectrum of 3.

MEDAC\_MVUMS2  
MEDAC\_MVUMS2 7 (0.227)

ES-ToF

12-May-2017  
1: TOF MS ES-  
1.50e3

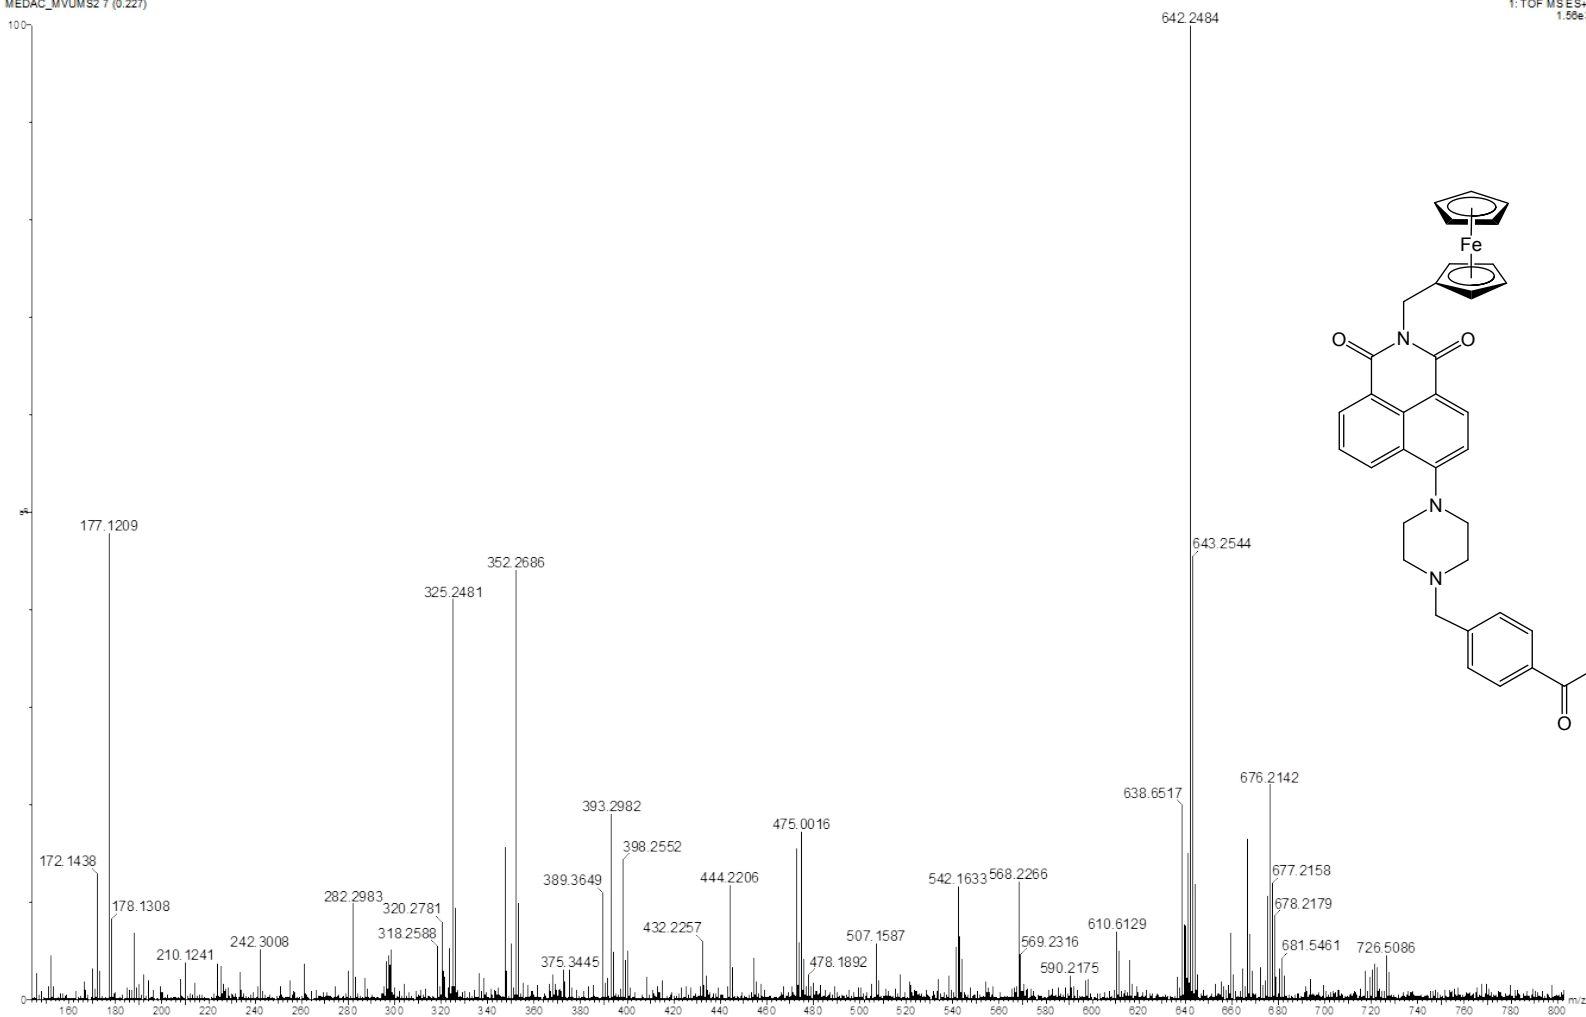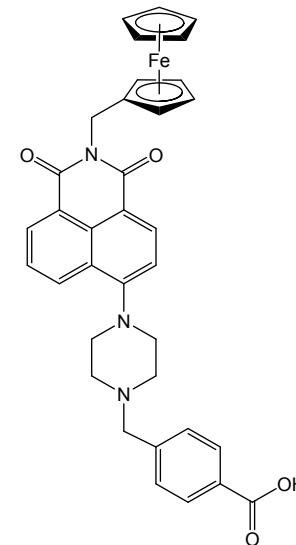

Figure S6. HRMS of compound 3.
